# Supplementary figures and images for: Real-Time Monitoring of Lysosomal Membrane Permeabilization Using Acridine Orange
Source: MDPI journal article supplement (doi:10.3390/mps6040072), 2023-08-09

## Western blots to Figure 5F

Cathepsin D

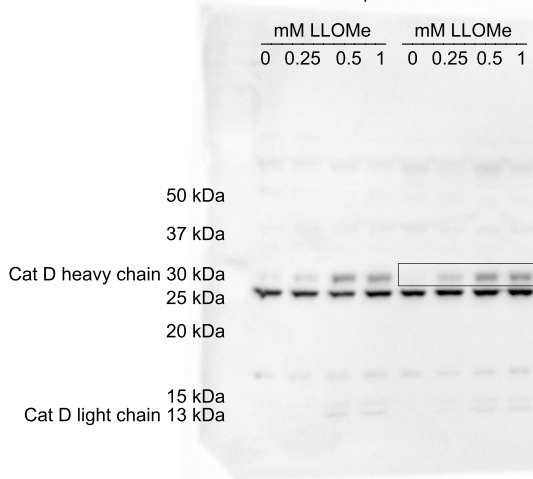

LDH

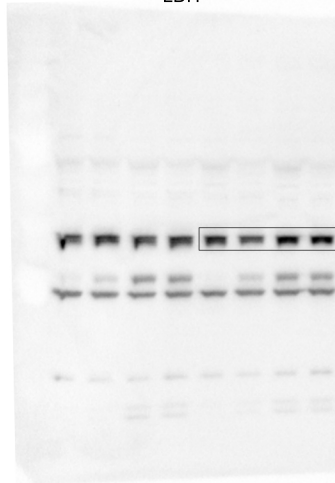

## Western blots to Figure 5G

Cathepsin D

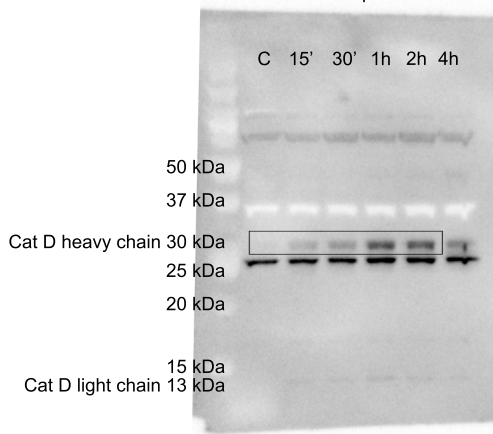

LDH

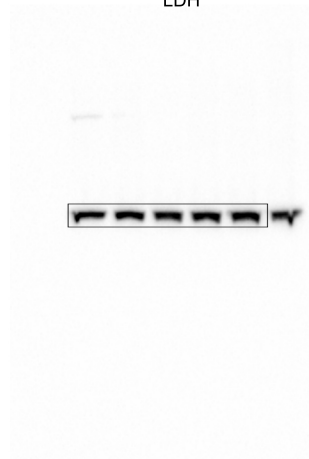

Supplement: s1 [file s1]
